# Supplementary material for: Sex Differences in Cognitive Response to Transcranial Direct Current Stimulation in Schizophrenia: A Randomized Controlled Trial
Source: Research Square preprint supplement (doi:10.21203/rs.3.rs-7841784/v1), 2025-10-30
Supplement: Supplementary file 1 [file 1f3edb0b0ced1758a07ac4c7.docx]

**Supplemental material**

**Table 1.**

Baseline demographic and clinical data per treatment group

| **Variable** | **Active tDCS (N=71)** | **Sham tDCS (N=68)** | **Stats** | **p-value** |
| --- | --- | --- | --- | --- |
| **Age, years (M, SD)** | 32.4 (11.2) | 31.9 (10.8) | t(137)=0.266 | 0.791 |
| **Gender (male, %)** | 62.0% | 72.1% | 1.596 | 0.214 |
| **Illness duration (M, SD)** | 10.4 (9.2) | 9.5 (9.0) | t(137)=0.623 | 0.534 |
| **Level of education, years attending school (Patient)** | 13.2 (3.5) | 13.1 (3.6) | t(137)=0.153 | 0.879 |
| **Level of education, years attending school (Family)** | 12.1 (3.9) | 10.8 (4.3) | t(137)=0.904 | 0.059 |
| **Functioning, % active employment** | 19.7 | 14.7 | t(137)=0.611 | 0.504 |
| **Chlorpromazine equivalent doses (M, SD)** | 445.8 (264.8) | 535.8 (298.5) | t(137)=-0.884 | 0.062 |
| **PANSS score (M, SD) – Positive** | 15.1 (5.5) | 14.6 (5.7) | t(137)=0.551 | 0.582 |
| **PANSS score (M, SD) – Negative** | 21.7 (5.9) | 20.9 (4.5) | t(137)=0.840 | 0.402 |
| **PANSS score (M, SD) – General psychopathology** | 40.0 (10.2) | 39.4 (8.3) | t(137)=0.426 | 0.671 |
| **MCCB score (M, SD) – Speed of processing** | 40.4 (9.3) | 37.5 (8.7) | t(137)=1.865 | 0.064 |
| **MCCB score (M, SD) – Attention vigilance** | 41.9 (9.7) | 39.1 (1.4) | t(137)=1.577 | 0.117 |
| **MCCB score (M, SD) – Working memory** | 45.6 (10.9) | 42.1 (12.4) | t(137)=1.757 | 0.081 |
| **MCCB score (M, SD) – Verbal learning** | 44.8 (13.6) | 42.1 (11.9) | t(137)=1.326 | 0.187 |
| **MCCB score (M, SD) – Visual learning** | 43.1 (12.2) | 41.5 (13.9) | t(137)=0.689 | 0.492 |
| **MCCB score (M, SD) – Reasoning problem solving** | 46.5 (10.9) | 42.0 (12.1) | t(137)=2.298 | 0.023 |
| **MCCB score (M, SD) – Social cognition** | 37.9 (12.6) | 39.4 (14.3) | t(137)= -0.635 | 0.572 |
| **MCCB score (M, SD) – Neurocognition** | 41.5 (10.5) | 37.6 (11.8) | t(137)=2.095 | 0.038 |

Note. Values are presented as means (M) with standard deviations (SD), unless otherwise indicated. Bold font indicates statistical significance (p < .05). MCCB = MATRICS Consensus Cognitive Battery (age- and gender-corrected T-scores); PANSS = Positive and Negative Syndrome Scale. Data adapted from García-Fernández et al., 2025.

**Table 2.**

Baseline antipsychotic distribution by sex

| **Antipsychotic** | **Men, n (%)** | **Women, n (%)** | **Total, n** |
| --- | --- | --- | --- |
| Aripiprazole | 28 (35.0) | 18 (45.0) | 46 |
| Cariprazine | 7 (8.8) | 6 (15.0) | 13 |
| Clozapine | 7 (8.8) | 3 (7.5) | 10 |
| Olanzapine | 6 (7.5) | 2 (5.0) | 8 |
| Paliperidone | 17 (21.3) | 6 (15.0) | 23 |
| Quetiapine | 2 (2.5) | 1 (2.5) | 3 |
| Risperidone | 13 (16.3) | 4 (10.0) | 17 |
| **Totals** | **80 (100)** | **40 (100)** | **120** |

*Note.* Percentages are within sex. Men vs. women**:** χ²(6) = 3.24, *p* = .779, indicating no significant baseline difference in antipsychotic distribution by sex.

**Table 3.**

Descriptive statistics for change scores (Δ = Post–Pre) in MCCB cognitive domains by intervention group and sex, with ANOVA results.

| **Domain** | **tDCS Males Δ (SD)** | **Sham Males Δ (SD)** | **tDCS Females Δ (SD)** | **Sham Females Δ (SD)** | **p Group** | **p Group×Sex** |
| --- | --- | --- | --- | --- | --- | --- |
| Working Memory | 3.70 (4.95) | 0.84 (1.66) | 4.04 (4.79) | 0.80 (1.70) | **<0.001** | 0.799 |
| Neurocognition | 0.97 (2.14) | -0.56 (4.62) | 1.28 (2.07) | 0.73 (0.96) | **0.041** | 0.437 |
| Speed of Processing | 0.01 (1.22) | 0.08 (1.31) | 0.19 (1.11) | 0.25 (1.29) | 0.754 | 0.932 |
| Attention/Vigilance | -1.02 (2.12) | -0.12 (1.95) | 0.54 (2.01) | 1.23 (2.11) | 0.155 | 0.833 |
| Verbal Learning | 0.72 (1.65) | 0.64 (1.43) | 0.41 (1.37) | 0.03 (1.22) | 0.552 | 0.764 |
| Visual Learning | 0.51 (1.89) | 0.69 (1.72) | 0.36 (1.58) | 0.28 (1.44) | 0.888 | 0.805 |
| Reasoning/Problem Solv. | 0.48 (1.97) | 0.77 (1.89) | -0.23 (1.68) | 0.42 (1.55) | 0.456 | 0.747 |
| Social Cognition | -0.63 (2.01) | -0.74 (2.12) | -1.21 (1.92) | -0.88 (1.77) | 0.946 | 0.888 |
| Overall Composite | 0.84 (2.35) | 0.34 (2.11) | 0.76 (2.04) | 0.29 (1.83) | 0.204 | 0.998 |

Values represent mean change scores (Δ = Post–Pre, in T-scores) with standard deviations (SD). “p Group” refers to the main effect of intervention (tDCS vs. Sham), and “p Group×Sex” refers to the interaction effect. Significant improvements were observed only in Working Memory and Neurocognition, with no evidence of group×sex interactions. tDCS = transcranial direct current stimulation.

**Table 4.**

ANCOVA for improvement in Neurocognition and Working Memory

| **Outcome** | **Factor** | **F (1, 109)** | **p** |
| --- | --- | --- | --- |
| Neurocognition improvement | Sex | 3.42 | 0.067 |
| **Antipsychotic type** | **5.02** | **0.027** |
| Intervention (tDCS vs sham) | 0.27 | 0.604 |
| Sex × Antipsychotic type | 0.00 | 0.967 |
| Sex × Intervention | 0.14 | 0.709 |
| Antipsychotic type × Intervention | 0.21 | 0.649 |
| Sex × Antipsychotic type × Intervention | 1.49 | 0.225 |
| Age | 0.03 | 0.874 |
| Equivalent dose | 0.05 | 0.830 |
| Working Memory improvement | Sex | 2.27 | 0.135 |
| Antipsychotic type | 0.16 | 0.689 |
| Intervention (tDCS vs sham) | 0.04 | 0.844 |
| Sex × Antipsychotic type | 1.31 | 0.255 |
| Sex × Intervention | 0.08 | 0.781 |
| Antipsychotic type × Intervention | 0.22 | 0.638 |
| Sex × Antipsychotic type × Intervention | 0.35 | 0.556 |
| Age | 0.39 | 0.536 |
| Equivalent dose | 0.07 | 0.798 |

Univariate ANCOVA models used Type III sums of squares with sum-to-zero contrasts for categorical factors. Covariates: age, chlorpromazine-equivalent dose. All tests are F(1,109). Significant effects (p < .05) are bolded.
