# Supplementary material for: Sex Differences in Cognitive Response to Transcranial Direct Current Stimulation in Schizophrenia: A Randomized Controlled Trial
Source: Research Square preprint supplement (doi:10.21203/rs.3.rs-7841784/v1), 2025-10-30
Supplement: Supplementary file 2 [file 9ebcab6df8d50359051a6301.docx]

**Tables**

**Table 1.**

Two-way ANOVA (Group × Sex) on change in Working Memory and Neurocognition

| **Outcome** | **Effect** | **DF** | **SS** | **F** | **p** | **Partial η²** |
| --- | --- | --- | --- | --- | --- | --- |
| **Change in Working Memory** | Intervention | 1 | 260.819 | 19.041 | 0.000028 | 0.141 |
|  | Sex | 1 | 0.819 | 0.060 | 0.807 | 0.001 |
|  | Intervention × Sex | 1 | 0.894 | 0.065 | 0.799 | 0.001 |
| **Change in Neurocognition** | Intervention | 1 | 43.249 | 4.268 | 0.041 | 0.035 |
|  | Sex | 1 | 13.780 | 1.360 | 0.246 | 0.012 |
|  | Intervention × Sex | 1 | 6.175 | 0.609 | 0.437 | 0.005 |

Note. Effects tested on change scores (post–pre, T-scores). DF: degrees of freedom; F: F statistic; SS: sum of squares; p: p-value.

**Table 2.**

Distribution of subjective cognitive improvement (SCI) by sex.

| **Sex** | **Improved (n)** | **Worse (n)** | **No change (n)** | **Total (n)** | **Improved (%)** | **Worse (%)** | **No change (%)** | **Total (%)** |
| --- | --- | --- | --- | --- | --- | --- | --- | --- |
| Male | 35 | 11 | 34 | 80 | 43.8 | 13.8 | 42.5 | 100.0 |
| Female | 16 | 1 | 23 | 40 | 40.0 | 2.5 | 57.5 | 100.0 |

*Note*: Values represent the distribution of responses on the Subjective Cognitive Improvement (SCI) scale by sex, reported as counts (n) and percentages (%). SCI categories: 1 = “I feel worse”, 2 = “No difference”, 3 = “I have improved”.

**Table 3.**

Concordance between objective improvement (change > 0) and subjective improvement (SCI = 3), by sex and cognitive domain

| **Sex** | **Outcome** | **Kappa** | **Accuracy** | **Sensitivity** | **Specificity** | **PPV** | **NPV** | **AUC** | **N** | **N objective improved** | **N subjective improved** |
| --- | --- | --- | --- | --- | --- | --- | --- | --- | --- | --- | --- |
| Male | Working Memory | 0.27 | 0.64 | 0.58 | 0.68 | 0.60 | 0.67 | 0.63 | 80 | 36 | 35 |
| Male | Neurocognition | 0.01 | 0.51 | 0.44 | 0.57 | 0.43 | 0.58 | 0.50 | 80 | 34 | 35 |
| Female | Working Memory | 0.22 | 0.60 | 0.50 | 0.72 | 0.69 | 0.54 | 0.61 | 40 | 22 | 16 |
| Female | Neurocognition | 0.27 | 0.63 | 0.52 | 0.77 | 0.75 | 0.54 | 0.64 | 40 | 23 | 16 |

Objective improvement defined as change > 0 (post–pre in T-scores). Subjective improvement defined as SCI = 3 (“I have improved”). Kappa = Cohen’s kappa coefficient; PPV = positive predictive value; NPV = negative predictive value; AUC = area under the ROC curve.
